# Supplementary material for: H2A monoubiquitination in Arabidopsis thaliana is generally independent of LHP1 and PRC2 activity
Source: Genome Biol. 2017 Apr 12;18:69. doi: 10.1186/s13059-017-1197-z (PMC5389094; doi:10.1186/s13059-017-1197-z)
Supplement: Supplementary file 3 — Supplementary Dataset S2: Genes exhibiting changes of H2AK121ub in clf28/swn7. (XLSX 99 kb) [file 13059_2017_1197_MOESM3_ESM.xlsx]

## Sheet: Sheet1
Additional file 3: Dataset 2. Genes exhibiting changes of H2AK121ub in clf28/swn7
Percentage indicates the levels of H2AK121ub marks relative to WT
H2AK121ub clf28/swn7 < 20%								H2AK121ub clf28/swn7 20-40%								H2AK121ub clf28/swn7 40-60%								H2AK121ub clf28/swn7 60-80%								H2AK121ub clf28/swn7 > 120%
	AT5G54800	GLUCOSE 6-PHOSPHATE/PHOSPHATE TRANSLOCATOR 1 (GPT1)							AT1G47560	EXOCYST COMPLEX COMPONENT SEC3B (SEC3B)							AT1G03106								AT1G01070								AT1G01183	MICRORNA165A (MIR165A)
									AT1G62710	BETA VACUOLAR PROCESSING ENZYME (BETA-VPE)							AT1G06800	PHOSPHOLIPASE A I GAMMA 1 (PLA-I{gamma}1)							AT1G01453								AT1G01670
									AT1G67100	LOB DOMAIN-CONTAINING PROTEIN 40 (LBD40)							AT1G07900	LOB DOMAIN-CONTAINING PROTEIN 1 (LBD1)							AT1G01480	1-AMINO-CYCLOPROPANE-1-CARBOXYLATE SYNTHASE 2 (ACS2)							AT1G02065	SQUAMOSA PROMOTER BINDING PROTEIN-LIKE 8 (SPL8)
									AT1G72080								AT1G08440								AT1G02190								AT1G02070
									AT2G01020								AT1G09960	SUCROSE TRANSPORTER 4 (SUT4)							AT1G02205	ECERIFERUM 1 (CER1)							AT1G02340	LONG HYPOCOTYL IN FAR-RED (HFR1)
									AT2G10940								AT1G11370								AT1G02310	ENDO-BETA-MANNANASE 1 (MAN1)							AT1G03840	MAGPIE (MGP)
									AT2G28340	GATA TRANSCRIPTION FACTOR 13 (GATA13)							AT1G11670								AT1G02620								AT1G03880	CRUCIFERIN 2 (CRU2)
									AT2G32540	CELLULOSE SYNTHASE-LIKE B4 (CSLB04)							AT1G14730								AT1G02770								AT1G04445
									AT2G39730	RUBISCO ACTIVASE (RCA)							AT1G15550	GIBBERELLIN 3-OXIDASE 1 (GA3OX1)							AT1G02810								AT1G04560
									AT3G04210								AT1G20070								AT1G02813								AT1G04625
									AT3G41761								AT1G20380								AT1G03850	GLUTAREDOXIN 13 (GRXS13)							AT1G04660
									AT3G41762								AT1G21980	PHOSPHATIDYLINOSITOL-4-PHOSPHATE 5-KINASE 1 (PIP5K1)							AT1G04150								AT1G05230	HOMEODOMAIN GLABROUS 2 (HDG2)
									AT3G48350	CYSTEINE ENDOPEPTIDASE 3 (CEP3)							AT1G22400	(UGT85A1)							AT1G04250	AUXIN RESISTANT 3 (AXR3)							AT1G05280
									AT4G09030	ARABINOGALACTAN PROTEIN 10 (AGP10)							AT1G23040								AT1G04500								AT1G05370
									AT4G20690								AT1G23070								AT1G06135								AT1G05510
									AT4G22540	OSBP(OXYSTEROL BINDING PROTEIN)-RELATED PROTEIN 2A (ORP2A)							AT1G23380	KNOTTED1-LIKE HOMEOBOX GENE 6 (KNAT6)							AT1G06320								AT1G05650
									AT4G32220								AT1G24147								AT1G06330								AT1G05800	DONGLE (DGL)
									AT5G10340								AT1G29670								AT1G06810								AT1G06080	DELTA 9 DESATURASE 1 (ADS1)
									AT5G24130								AT1G31580	(ECS1)							AT1G07090	LIGHT SENSITIVE HYPOCOTYLS 6 (LSH6)							AT1G06350
									AT5G38400								AT1G32172								AT1G07280								AT1G06620
									AT5G57390	AINTEGUMENTA-LIKE 5 (AIL5)							AT1G42560	MILDEW RESISTANCE LOCUS O 9 (MLO9)							AT1G07430	HIGHLY ABA-INDUCED PP2C GENE 2 (HAI2)							AT1G06680	PHOTOSYSTEM II SUBUNIT P-1 (PSBP-1)
									AT5G57391								AT1G47405								AT1G07645	DESSICATION-INDUCED 1VOC SUPERFAMILY PROTEIN (DSI-1VOC)							AT1G07640	(OBP2)
									AT5G60610								AT1G49005	CLAVATA3/ESR-RELATED 11 (CLE11)							AT1G07985								AT1G08090	NITRATE TRANSPORTER 2:1 (NRT2:1)
									AT5G60760								AT1G49220								AT1G08170								AT1G08150	(ATCHX5)
																	AT1G51210								AT1G08320	TGACG (TGA) MOTIF-BINDING PROTEIN 9 (TGA9)							AT1G08320	TGACG (TGA) MOTIF-BINDING PROTEIN 9 (TGA9)
																	AT1G51355								AT1G09350	GALACTINOL SYNTHASE 3 (GolS3)							AT1G08430	ALUMINUM-ACTIVATED MALATE TRANSPORTER 1 (ALMT1)
																	AT1G52410	TSK-ASSOCIATING PROTEIN 1 (TSA1)							AT1G09500								AT1G09380
																	AT1G53350								AT1G09930	OLIGOPEPTIDE TRANSPORTER 2 (OPT2)							AT1G09930	OLIGOPEPTIDE TRANSPORTER 2 (OPT2)
																	AT1G54450								AT1G10250								AT1G10880
																	AT1G56040								AT1G10270	GLUTAMINE-RICH PROTEIN 23 (GRP23)							AT1G11190	BIFUNCTIONAL NUCLEASE I (BFN1)
																	AT1G58360	AMINO ACID PERMEASE 1 (AAP1)							AT1G10657								AT1G11470
																	AT1G60470	GALACTINOL SYNTHASE 4 (GolS4)							AT1G10682								AT1G12130
																	AT1G61800	GLUCOSE-6-PHOSPHATE/PHOSPHATE TRANSLOCATOR 2 (GPT2)							AT1G11230								AT1G12170
																	AT1G62035	MICRORNA171C (MIR171C)							AT1G11250	SYNTAXIN OF PLANTS 125 (SYP125)							AT1G12180
																	AT1G63420								AT1G11572								AT1G12490
																	AT1G64618								AT1G12030								AT1G12570
																	AT1G66120	ACYL-ACTIVATING ENZYME 11 (AAE11)							AT1G12070								AT1G12630
																	AT1G66880								AT1G12160								AT1G12740	CYTOCHROME P450, FAMILY 87, SUBFAMILY A, POLYPEPTIDE 2 (CYP87A2)
																	AT1G68320	MYB DOMAIN PROTEIN 62 (MYB62)							AT1G12200	FLAVIN MONOOXYGENASE (FMO)							AT1G12950	ROOT HAIR SPECIFIC 2 (RSH2)
																	AT1G68568								AT1G12805								AT1G12980	ENHANCER OF SHOOT REGENERATION 1 (ESR1)
																	AT1G68570								AT1G12855								AT1G13130
																	AT1G68825	ROTUNDIFOLIA LIKE 15 (RTFL15)							AT1G13070	CYTOCHROME P450, FAMILY 71, SUBFAMILY B, POLYPEPTIDE 27 (CYP71B27)							AT1G13290	DEFECTIVELY ORGANIZED TRIBUTARIES 5 (DOT5)
																	AT1G69310	WRKY DNA-BINDING PROTEIN 57 (WRKY57)							AT1G13607								AT1G13670
																	AT1G72100								AT1G13608								AT1G13710	CYTOCHROME P450, FAMILY 78, SUBFAMILY A, POLYPEPTIDE 5 (CYP78A5)
																	AT1G72125								AT1G13680								AT1G14100	FUCOSYLTRANSFERASE 8 (FUT8)
																	AT1G75040	PATHOGENESIS-RELATED GENE 5 (PR5)							AT1G14630								AT1G14120
																	AT1G75750	GAST1 PROTEIN HOMOLOG 1 (GASA1)							AT1G14780								AT1G14240
																	AT1G78840								AT1G14870	PLANT CADMIUM RESISTANCE 2 (PCR2)							AT1G14250
																	AT1G79370	CYTOCHROME P450, FAMILY 79, SUBFAMILY C, POLYPEPTIDE 1 (CYP79C1)							AT1G15320								AT1G14760	KNOX ARABIDOPSIS THALIANA MEINOX (KNATM)
																	AT1G80865								AT1G15380	GLYOXYLASE I 4 (GLYI4)							AT1G14940
																	AT2G01890	PURPLE ACID PHOSPHATASE 8 (PAP8)							AT1G15540								AT1G14950
																	AT2G03360								AT1G17060	CYTOCHROME P450 72C1 (CYP72C1)							AT1G14960
																	AT2G04030	(CR88)							AT1G17190	GLUTATHIONE S-TRANSFERASE TAU 26 (GSTU26)							AT1G15360	SHINE 1 (SHN1)
																	AT2G04795								AT1G18210								AT1G15600
																	AT2G05380	GLYCINE-RICH PROTEIN 3 SHORT ISOFORM (GRP3S)							AT1G18280								AT1G16390	ORGANIC CATION/CARNITINE TRANSPORTER 3 (OCT3)
																	AT2G15020								AT1G18400	BR ENHANCED EXPRESSION 1 (BEE1)							AT1G16400	CYTOCHROME P450, FAMILY 79, SUBFAMILY F, POLYPEPTIDE 2 (CYP79F2)
																	AT2G16570	GLN PHOSPHORIBOSYL PYROPHOSPHATE AMIDOTRANSFERASE 1 (ASE1)							AT1G19670	CHLOROPHYLLASE 1 (CLH1)							AT1G16530	ASYMMETRIC LEAVES 2-LIKE 9 (ASL9)
																	AT2G17500								AT1G19780	CYCLIC NUCLEOTIDE GATED CHANNEL 8 (CNGC8)							AT1G17190	GLUTATHIONE S-TRANSFERASE TAU 26 (GSTU26)
																	AT2G21720								AT1G19850	MONOPTEROS (MP)							AT1G18050
																	AT2G22470	ARABINOGALACTAN PROTEIN 2 (AGP2)							AT1G20180								AT1G18290
																	AT2G22970	SERINE CARBOXYPEPTIDASE-LIKE 11 (SCPL11)							AT1G21850	SKU5 SIMILAR 8 (sks8)							AT1G19620
																	AT2G22980	SERINE CARBOXYPEPTIDASE-LIKE 13 (SCPL13)							AT1G22220	AUXIN UP-REGULATED F-BOX PROTEIN 2 (AUF2)							AT1G19830
																	AT2G25890								AT1G22350								AT1G20340	DNA-DAMAGE-REPAIR/TOLERATION PROTEIN 112 (DRT112)
																	AT2G26020	PLANT DEFENSIN 1.2B (PDF1.2b)							AT1G22360	UDP-GLUCOSYL TRANSFERASE 85A2 (UGT85A2)							AT1G20860	PHOSPHATE TRANSPORTER 1;8 (PHT1;8)
																	AT2G27660								AT1G22380	UDP-GLUCOSYL TRANSFERASE 85A3 (UGT85A3)							AT1G20900	ESCAROLA (ESC)
																	AT2G30240	(ATCHX13)							AT1G22480								AT1G20990
																	AT2G30750	CYTOCHROME P450, FAMILY 71, SUBFAMILY A, POLYPEPTIDE 12 (CYP71A12)							AT1G22500	ARABIDOPSIS TOXICOS EN LEVADURA 15 (ATL15)							AT1G21310	EXTENSIN 3 (EXT3)
																	AT2G31940								AT1G22600								AT1G21940
																	AT2G32530	CELLULOSE SYNTHASE-LIKE B3 (CSLB03)							AT1G22710	SUCROSE-PROTON SYMPORTER 2 (SUC2)							AT1G21990
																	AT2G35810								AT1G22900								AT1G22340	UDP-GLUCOSYL TRANSFERASE 85A7 (UGT85A7)
																	AT2G35830								AT1G22910								AT1G23160
																	AT2G36090								AT1G23000								AT1G23200
																	AT2G37040	PHE AMMONIA LYASE 1 (pal1)							AT1G23160								AT1G23340
																	AT2G41260	(M17)							AT1G23300								AT1G23570
																	AT2G41470								AT1G23730	BETA CARBONIC ANHYDRASE 3 (BCA3)							AT1G23760	(JP630)
																	AT2G44220								AT1G24148								AT1G24000
																	AT2G44840	ETHYLENE-RESPONSIVE ELEMENT BINDING FACTOR 13 (ERF13)							AT1G24470	BETA-KETOACYL REDUCTASE 2 (KCR2)							AT1G24010
																	AT2G47260	WRKY DNA-BINDING PROTEIN 23 (WRKY23)							AT1G24577								AT1G24470	BETA-KETOACYL REDUCTASE 2 (KCR2)
																	AT3G01500	CARBONIC ANHYDRASE 1 (CA1)							AT1G25230								AT1G24480
																	AT3G01516								AT1G25450	3-KETOACYL-COA SYNTHASE 5 (KCS5)							AT1G24485
																	AT3G04220								AT1G25510								AT1G24590	DORNROSCHEN-LIKE (DRNL)
																	AT3G05400								AT1G25530								AT1G24650
																	AT3G06437								AT1G28230	PURINE PERMEASE 1 (PUP1)							AT1G25250	INDETERMINATE(ID)-DOMAIN 16 (IDD16)
																	AT3G13810	INDETERMINATE(ID)-DOMAIN 11 (IDD11)							AT1G28270	RALF-LIKE 4 (RALFL4)							AT1G25270
																	AT3G15605								AT1G28360	ERF DOMAIN PROTEIN 12 (ERF12)							AT1G25300
																	AT3G18610	NUCLEOLIN LIKE 2 (NUC-L2)							AT1G28590								AT1G25340	MYB DOMAIN PROTEIN 116 (MYB116)
																	AT3G22060								AT1G30100	NINE-CIS-EPOXYCAROTENOID DIOXYGENASE 5 (NCED5)							AT1G26200
																	AT3G22410								AT1G30814								AT1G26515
																	AT3G23550								AT1G31173	MICRORNA167D (MIR167D)							AT1G26780	MYB DOMAIN PROTEIN 117 (MYB117)
																	AT3G24650	ABA INSENSITIVE 3 (ABI3)							AT1G31290	ARGONAUTE 3 (AGO3)							AT1G26870	FEZ (FEZ)
																	AT3G24770	CLAVATA3/ESR-RELATED 41 (CLE41)							AT1G31355								AT1G27030
																	AT3G25780	ALLENE OXIDE CYCLASE 3 (AOC3)							AT1G31540								AT1G27040
																	AT3G26010								AT1G32170	XYLOGLUCAN ENDOTRANSGLUCOSYLASE/HYDROLASE 30 (XTH30)							AT1G27461
																	AT3G29190								AT1G32450	NITRATE TRANSPORTER 1.5 (NRT1.5)							AT1G27610
																	AT3G41768								AT1G32560	LATE EMBRYOGENESIS ABUNDANT 4-1 (AtLEA4-1)							AT1G27660
																	AT3G48720	DEFICIENT IN CUTIN FERULATE (DCF)							AT1G32710								AT1G27740	ROOT HAIR DEFECTIVE 6-LIKE 4 (RSL4)
																	AT3G52780	(PAP20)							AT1G32780								AT1G27990
																	AT3G58865	SADHU NON-CODING RETROTRANSPOSON 10-1 (SADHU10-1)							AT1G32850	UBIQUITIN-SPECIFIC PROTEASE 11 (UBP11)							AT1G28020
																	AT3G60120	BETA GLUCOSIDASE 27 (BGLU27)							AT1G33102								AT1G28030
																	AT3G60900	FASCICLIN-LIKE ARABINOGALACTAN-PROTEIN 10 (FLA10)							AT1G33510								AT1G28080
																	AT3G61150	HOMEODOMAIN GLABROUS 1 (HDG1)							AT1G33860								AT1G28300	LEAFY COTYLEDON 2 (LEC2)
																	AT3G61897	MICRORNA166B (MIR166B)							AT1G34670	MYB DOMAIN PROTEIN 93 (MYB93)							AT1G28470	NAC DOMAIN CONTAINING PROTEIN 10 (NAC010)
																	AT3G62460								AT1G35320								AT1G28480	(GRX480)
																	AT4G00050	UNFERTILIZED EMBRYO SAC 10 (UNE10)							AT1G35465								AT1G28650
																	AT4G00730	ANTHOCYANINLESS 2 (ANL2)							AT1G36060								AT1G29090
																	AT4G01525	SADHU NON-CODING RETROTRANSPOSON 5-1 (SADHU5-1)							AT1G44478								AT1G29100
																	AT4G02110								AT1G44740								AT1G29290
																	AT4G03038								AT1G45201	TRIACYLGLYCEROL LIPASE-LIKE 1 (TLL1)							AT1G29920	CHLOROPHYLL A/B-BINDING PROTEIN 2 (CAB2)
																	AT4G08740								AT1G46552								AT1G29930	CHLOROPHYLL A/B BINDING PROTEIN 1 (CAB1)
																	AT4G08870	ARGININE AMIDOHYDROLASE 2 (ARGAH2)							AT1G47400								AT1G30080
																	AT4G11200								AT1G48000	MYB DOMAIN PROTEIN 112 (MYB112)							AT1G30160
																	AT4G11350								AT1G48130	1-CYSTEINE PEROXIREDOXIN 1 (PER1)							AT1G30170
																	AT4G13410	(ATCSLA15)							AT1G48340								AT1G30650	WRKY DNA-BINDING PROTEIN 14 (WRKY14)
																	AT4G15630								AT1G49330								AT1G30760
																	AT4G16690	METHYL ESTERASE 16 (MES16)							AT1G51805								AT1G30780
																	AT4G18660								AT1G52150	(ATHB-15)							AT1G30790
																	AT4G19710	ASPARTATE KINASE-HOMOSERINE DEHYDROGENASE II (AK-HSDH II)							AT1G52800								AT1G30795
																	AT4G20700								AT1G52990								AT1G30950	UNUSUAL FLORAL ORGANS (UFO)
																	AT4G21910								AT1G53080								AT1G31690
																	AT4G22390								AT1G53540								AT1G31990
																	AT4G23215								AT1G53610								AT1G32770	NAC DOMAIN CONTAINING PROTEIN 12 (NAC012)
																	AT4G23990	CELLULOSE SYNTHASE LIKE G3 (CSLG3)							AT1G53830	PECTIN METHYLESTERASE 2 (PME2)							AT1G33090
																	AT4G26260	MYO-INOSITOL OXYGENASE 4 (MIOX4)							AT1G55010	PLANT DEFENSIN 1.5 (PDF1.5)							AT1G33720	CYTOCHROME P450, FAMILY 76, SUBFAMILY C, POLYPEPTIDE 6 (CYP76C6)
																	AT4G26270	PHOSPHOFRUCTOKINASE 3 (PFK3)							AT1G55110	INDETERMINATE(ID)-DOMAIN 7 (IDD7)							AT1G33840
																	AT4G34770								AT1G55260								AT1G34520
																	AT4G36170								AT1G55650								AT1G34580
																	AT4G36280								AT1G56020								AT1G35830
																	AT4G36370								AT1G56250	PHLOEM PROTEIN 2-B14 (PP2-B14)							AT1G37140	MEI2 C-TERMINAL RRM ONLY LIKE 1 (MCT1)
																	AT4G36380	ROTUNDIFOLIA 3 (ROT3)							AT1G56270								AT1G43790	TRACHEARY ELEMENT DIFFERENTIATION-RELATED 6 (TED6)
																	AT4G37750	AINTEGUMENTA (ANT)							AT1G56550	RHAMNOGALACTURONAN SPECI&#64257;C XYLOSYLTRANSFERASE 3 (RGXT3)							AT1G43800	FLORAL TRANSITION AT THE MERISTEM1 (FTM1)
																	AT4G37980	ELICITOR-ACTIVATED GENE 3-1 (ELI3-1)							AT1G56553								AT1G44090	GIBBERELLIN 20-OXIDASE 5 (GA20OX5)
																	AT4G38860								AT1G57850								AT1G44191
																	AT4G39860								AT1G58450	TETRATRICOPEPTIDE REPEAT 6 (TPR6)							AT1G44830
																	AT5G06530	ATP-BINDING CASSETTE G22 (ABCG22)							AT1G60480								AT1G46480	WUSCHEL RELATED HOMEOBOX 4 (WOX4)
																	AT5G07500	(PEI1)							AT1G61760								AT1G47300
																	AT5G09550								AT1G62030								AT1G47600	BETA GLUCOSIDASE 34 (BGLU34)
																	AT5G10140	FLOWERING LOCUS C (FLC)							AT1G62300	(WRKY6)							AT1G47610
																	AT5G10510	AINTEGUMENTA-LIKE 6 (AIL6)							AT1G62420								AT1G48500	JASMONATE-ZIM-DOMAIN PROTEIN 4 (JAZ4)
																	AT5G14690								AT1G62421								AT1G48530
																	AT5G17090								AT1G62500								AT1G48730
																	AT5G20630	GERMIN 3 (GER3)							AT1G62510								AT1G48800
																	AT5G21105								AT1G62540	FLAVIN-MONOOXYGENASE GLUCOSINOLATE S-OXYGENASE 2 (FMO GS-OX2)							AT1G48820
																	AT5G21150	ARGONAUTE 9 (AGO9)							AT1G62570	FLAVIN-MONOOXYGENASE GLUCOSINOLATE S-OXYGENASE 4 (FMO GS-OX4)							AT1G48910	YUCCA 10 (YUC10)
																	AT5G22300	NITRILASE 4 (NIT4)							AT1G62630								AT1G48990
																	AT5G24150	(SQP1)							AT1G62760								AT1G49270	PROLINE-RICH EXTENSIN-LIKE RECEPTOR KINASE 7 (PERK7)
																	AT5G24155								AT1G63650	ENHANCER OF GLABRA 3 (EGL3)							AT1G49310
																	AT5G24530	DOWNY MILDEW RESISTANT 6 (DMR6)							AT1G63710	CYTOCHROME P450, FAMILY 86, SUBFAMILY A, POLYPEPTIDE 7 (CYP86A7)							AT1G50870
																	AT5G24920	GLUTAMINE DUMPER 5 (GDU5)							AT1G64625								AT1G50880
																	AT5G27370								AT1G64660	METHIONINE GAMMA-LYASE (MGL)							AT1G51355
																	AT5G27380	GLUTATHIONE SYNTHETASE 2 (GSH2)							AT1G64780	AMMONIUM TRANSPORTER 1;2 (AMT1;2)							AT1G51470	BETA GLUCOSIDASE 35 (BGLU35)
																	AT5G28300								AT1G64910								AT1G51480
																	AT5G45307	MICRORNA168B (MIR168B)							AT1G65480	FLOWERING LOCUS T (FT)							AT1G52130
																	AT5G48550								AT1G65490								AT1G52410	TSK-ASSOCIATING PROTEIN 1 (TSA1)
																	AT5G50360								AT1G65870								AT1G52490
																	AT5G50361								AT1G65875								AT1G52690	LATE EMBRYOGENESIS ABUNDANT 7 (LEA7)
																	AT5G50770	HYDROXYSTEROID DEHYDROGENASE 6 (HSD6)							AT1G66140	ZINC FINGER PROTEIN 4 (ZFP4)							AT1G53325
																	AT5G50950	FUMARASE 2 (FUM2)							AT1G66320								AT1G53350
																	AT5G51210	OLEOSIN3 (OLEO3)							AT1G66950	ATP-BINDING CASSETTE G39 (ABCG39)							AT1G53360
																	AT5G53740								AT1G67195	MICRORNA414 (MIR414)							AT1G53640
																	AT5G54500	FLAVODOXIN-LIKE QUINONE REDUCTASE 1 (FQR1)							AT1G67328								AT1G53990	GDSL-MOTIF LIPASE 3 (GLIP3)
																	AT5G54610	ANKYRIN (ANK)							AT1G67330								AT1G54000	GDSL LIPASE-LIKE PROTEIN 22 (GLL22)
																	AT5G61070	HISTONE DEACETYLASE OF THE RPD3/HDA1 SUPERFAMILY 18 (HDA18)							AT1G67770	TERMINAL EAR1-LIKE 2 (TEL2)							AT1G54860
																	AT5G64770	ROOT MERISTEM GROWTH FACTOR 9 (RGF9)							AT1G68050	FLAVIN-BINDING, KELCH REPEAT, F BOX 1 (FKF1)							AT1G54870
																	AT5G65070	MADS AFFECTING FLOWERING 4 (MAF4)							AT1G68460	ISOPENTENYLTRANSFERASE 1 (IPT1)							AT1G54930
																	AT5G65730	XYLOGLUCAN ENDOTRANSGLUCOSYLASE/HYDROLASE 6 (XTH6)							AT1G68510	LOB DOMAIN-CONTAINING PROTEIN 42 (LBD42)							AT1G54940	PLANT GLYCOGENIN-LIKE STARCH INITIATION PROTEIN 4 (PGSIP4)
																	AT5G66870	ASYMMETRIC LEAVES 2-LIKE 1 (ASL1)							AT1G68520								AT1G54955
																									AT1G68530	3-KETOACYL-COA SYNTHASE 6 (KCS6)							AT1G55580	LATERAL SUPPRESSOR (LAS)
																									AT1G68620								AT1G55670	PHOTOSYSTEM I SUBUNIT G (PSAG)
																									AT1G69600	ZINC FINGER HOMEODOMAIN 1 (ZFHD1)							AT1G56410	EARLY-RESPONSIVE TO DEHYDRATION 2 (ERD2)
																									AT1G69870	NITRATE TRANSPORTER 1.7 (NRT1.7)							AT1G56510	WHITE RUST RESISTANCE 4 (WRR4)
																									AT1G69981								AT1G56680
																									AT1G70080								AT1G57750	CYTOCHROME P450, FAMILY 96, SUBFAMILY A, POLYPEPTIDE 15 (CYP96A15)
																									AT1G70250								AT1G57800	VARIANT IN METHYLATION 5 (VIM5)
																									AT1G70640								AT1G58330	(ZW2)
																									AT1G70885								AT1G59500	(GH3.4)
																									AT1G70950								AT1G59725
																									AT1G70990								AT1G59950
																									AT1G71160	3-KETOACYL-COA SYNTHASE 7 (KCS7)							AT1G60040	AGAMOUS-LIKE 49 (AGL49)
																									AT1G71520								AT1G60060
																									AT1G71960	ATP-BINDING CASETTE G25 (ABCG25)							AT1G60320
																									AT1G72570								AT1G60410
																									AT1G75450	CYTOKININ OXIDASE 5 (CKX5)							AT1G61093
																									AT1G75590								AT1G61590
																									AT1G75790	SKU5 SIMILAR 18 (sks18)							AT1G61660
																									AT1G75880								AT1G62300	(WRKY6)
																									AT1G76110								AT1G62560	FLAVIN-MONOOXYGENASE GLUCOSINOLATE S-OXYGENASE 3 (FMO GS-OX3)
																									AT1G77690	LIKE AUX1 3 (LAX3)							AT1G62660
																									AT1G78030								AT1G62981
																									AT1G78090	TREHALOSE-6-PHOSPHATE PHOSPHATASE B (TPPB)							AT1G62990	KNOTTED-LIKE HOMEOBOX OF ARABIDOPSIS THALIANA 7 (KNAT7)
																									AT1G78450								AT1G63070
																									AT1G78710	TRICHOME BIREFRINGENCE-LIKE 42 (TBL42)							AT1G63560
																									AT1G78720								AT1G63910	MYB DOMAIN PROTEIN 103 (AtMYB103)
																									AT1G78770	ANAPHASE PROMOTING COMPLEX 6 (APC6)							AT1G64030	SERPIN 3 (SRP3)
																									AT1G78860								AT1G64035
																									AT1G78950								AT1G64255
																									AT1G78955	CAMELLIOL C SYNTHASE 1 (CAMS1)							AT1G64620
																									AT1G78960	LUPEOL SYNTHASE 2 (LUP2)							AT1G65330	PHERES1 (PHE1)
																									AT1G79170								AT1G65620	ASYMMETRIC LEAVES 2 (AS2)
																									AT1G79420								AT1G65640	DEGP PROTEASE 4 (DegP4)
																									AT1G79450	ALA-INTERACTING SUBUNIT 5 (ALIS5)							AT1G65880	BENZOYLOXYGLUCOSINOLATE 1 (BZO1)
																									AT1G80130								AT1G65910	NAC DOMAIN CONTAINING PROTEIN 28 (NAC028)
																									AT1G80133								AT1G66045
																									AT1G80140								AT1G66060
																									AT1G80340	GIBBERELLIN 3-OXIDASE 2 (GA3OX2)							AT1G66380	MYB DOMAIN PROTEIN 114 (MYB114)
																									AT1G80740	CHROMOMETHYLASE 1 (CMT1)							AT1G66770	(SWEET6)
																									AT2G01520	MLP-LIKE PROTEIN 328 (MLP328)							AT1G66780
																									AT2G01810								AT1G67090	RIBULOSE BISPHOSPHATE CARBOXYLASE SMALL CHAIN 1A (RBCS1A)
																									AT2G03010								AT1G67710	RESPONSE REGULATOR 11 (ARR11)
																									AT2G03370								AT1G67740	PHOTOSYSTEM II BY (PSBY)
																									AT2G04050								AT1G67770	TERMINAL EAR1-LIKE 2 (TEL2)
																									AT2G04100								AT1G68040
																									AT2G04160	AUXIN-INDUCED IN ROOT CULTURES 3 (AIR3)							AT1G68130	INDETERMINATE(ID)-DOMAIN 14 (IDD14)
																									AT2G05520	GLYCINE-RICH PROTEIN 3 (GRP-3)							AT1G68170
																									AT2G05530								AT1G68250
																									AT2G15400	(NRPE3B)							AT1G68380
																									AT2G16365								AT1G68390
																									AT2G16700	ACTIN DEPOLYMERIZING FACTOR 5 (ADF5)							AT1G68480	JAGGED (JAG)
																									AT2G16730	(BGAL13)							AT1G68600
																									AT2G16760								AT1G68810
																									AT2G17043								AT1G69120	APETALA1 (AP1)
																									AT2G17960								AT1G69180	CRABS CLAW (CRC)
																									AT2G18050	HISTONE H1-3 (HIS1-3)							AT1G69870	NITRATE TRANSPORTER 1.7 (NRT1.7)
																									AT2G19460								AT1G70510	KNOTTED-LIKE FROM ARABIDOPSIS THALIANA 2 (KNAT2)
																									AT2G20350								AT1G70830	MLP-LIKE PROTEIN 28 (MLP28)
																									AT2G21260								AT1G70840	MLP-LIKE PROTEIN 31 (MLP31)
																									AT2G22330	CYTOCHROME P450, FAMILY 79, SUBFAMILY B, POLYPEPTIDE 3 (CYP79B3)							AT1G71390	RECEPTOR LIKE PROTEIN 11 (RLP11)
																									AT2G22540	SHORT VEGETATIVE PHASE (SVP)							AT1G71691
																									AT2G23010	SERINE CARBOXYPEPTIDASE-LIKE 9 (SCPL9)							AT1G71930	VASCULAR RELATED NAC-DOMAIN PROTEIN 7 (VND7)
																									AT2G23130	ARABINOGALACTAN PROTEIN 17 (AGP17)							AT1G72100
																									AT2G24810								AT1G72140
																									AT2G25160	CYTOCHROME P450, FAMILY 82, SUBFAMILY F, POLYPEPTIDE 1 (CYP82F1)							AT1G72520	LIPOXYGENASE 4 (LOX4)
																									AT2G25260								AT1G72800
																									AT2G25440	RECEPTOR LIKE PROTEIN 20 (RLP20)							AT1G73220	ORGANIC CATION/CARNITINE TRANSPORTER1 (OCT1)
																									AT2G25470	RECEPTOR LIKE PROTEIN 21 (RLP21)							AT1G73410	MYB DOMAIN PROTEIN 54 (MYB54)
																									AT2G25510								AT1G73510
																									AT2G25630	BETA GLUCOSIDASE 14 (BGLU14)							AT1G73805	SAR DEFICIENT 1 (SARD1)
																									AT2G26010	PLANT DEFENSIN 1.3 (PDF1.3)							AT1G73810
																									AT2G26050								AT1G74000	STRICTOSIDINE SYNTHASE 3 (SS3)
																									AT2G26450								AT1G74500	ACTIVATION-TAGGED BRI1(BRASSINOSTEROID-INSENSITIVE 1)-SUPPRESSOR 1 (BS1)
																									AT2G26870	NON-SPECIFIC PHOSPHOLIPASE C2 (NPC2)							AT1G74660	MINI ZINC FINGER 1 (MIF1)
																									AT2G27670								AT1G75160
																									AT2G28090								AT1G75520	SHI-RELATED SEQUENCE 5 (SRS5)
																									AT2G28180	(ATCHX8)							AT1G75720
																									AT2G28490								AT1G75920
																									AT2G28500	LOB DOMAIN-CONTAINING PROTEIN 11 (LBD11)							AT1G75940	(ATA27)
																									AT2G28790								AT1G76135	MICRORNA394B (MIR394B)
																									AT2G29045	LOW-MOLECULAR-WEIGHT CYSTEINE-RICH 62 (LCR62)							AT1G76210
																									AT2G29090	CYTOCHROME P450, FAMILY 707, SUBFAMILY A, POLYPEPTIDE 2 (CYP707A2)							AT1G76250
																									AT2G29110	GLUTAMATE RECEPTOR 2.8 (GLR2.8)							AT1G76420	CUP SHAPED COTYLEDON3 (CUC3)
																									AT2G29130	LACCASE 2 (LAC2)							AT1G76500	SUPPRESSOR OF PHYB-4#3 (SOB3)
																									AT2G29330	TROPINONE REDUCTASE (TRI)							AT1G76830
																									AT2G29350	SENESCENCE-ASSOCIATED GENE 13 (SAG13)							AT1G77160
																									AT2G29370								AT1G77950	AGAMOUS-LIKE 67 (AGL67)
																									AT2G29654								AT1G78330
																									AT2G30230								AT1G78640
																									AT2G30770	CYTOCHROME P450, FAMILY 71, SUBFAMILY A, POLYPEPTIDE 13 (CYP71A13)							AT1G78980	STRUBBELIG-RECEPTOR FAMILY 5 (SRF5)
																									AT2G31005								AT1G79430	ALTERED PHLOEM DEVELOPMENT (APL)
																									AT2G31990								AT1G79580	SOMBRERO (SMB)
																									AT2G32350								AT1G79840	GLABRA 2 (GL2)
																									AT2G32960	PLANT AND FUNGI ATYPICAL DUAL-SPECI&#64257;CITY PHOSPHATASE 2 (PFA-DSP2)							AT1G80090	CBS DOMAIN CONTAINING PROTEIN 4 (CBSX4)
																									AT2G33070	NITRILE SPECIFIER PROTEIN 2 (NSP2)							AT1G80580
																									AT2G33270	ATYPICAL CYS HIS RICH THIOREDOXIN 3 (ACHT3)							AT1G80730	ZINC-FINGER PROTEIN 1 (ZFP1)
																									AT2G33670	MILDEW RESISTANCE LOCUS O 5 (MLO5)							AT1G80840	WRKY DNA-BINDING PROTEIN 40 (WRKY40)
																									AT2G33710								AT2G01940	SHOOT GRAVITROPISM 5 (SGR5)
																									AT2G33980	NUDIX HYDROLASE HOMOLOG 22 (NUDT22)							AT2G02000	GLUTAMATE DECARBOXYLASE 3 (GAD3)
																									AT2G34070	TRICHOME BIREFRINGENCE-LIKE 37 (TBL37)							AT2G02070	INDETERMINATE(ID)-DOMAIN 5 (IDD5)
																									AT2G34080								AT2G02310	PHLOEM PROTEIN 2-B6 (PP2-B6)
																									AT2G34110								AT2G02450	LONG VEGETATIVE PHASE 1 (LOV1)
																									AT2G34185								AT2G02540	HOMEOBOX PROTEIN 21 (HB21)
																									AT2G34315								AT2G03250
																									AT2G34430	LIGHT-HARVESTING CHLOROPHYLL-PROTEIN COMPLEX II SUBUNIT B1 (LHB1B1)							AT2G03500
																									AT2G35300	LATE EMBRYOGENESIS ABUNDANT 18 (LEA18)							AT2G04025	ROOT MERISTEM GROWTH FACTOR 3 (RGF3)
																									AT2G35820								AT2G04500
																									AT2G35930	PLANT U-BOX 23 (PUB23)							AT2G05100	PHOTOSYSTEM II LIGHT HARVESTING COMPLEX GENE 2.1 (LHCB2.1)
																									AT2G36080								AT2G05410
																									AT2G36420	TON1 RECRUITING MOTIF 27 (TRM27)							AT2G07130
																									AT2G36770								AT2G14710
																									AT2G36830	GAMMA TONOPLAST INTRINSIC PROTEIN (GAMMA-TIP)							AT2G14960	(GH3.1)
																									AT2G36940								AT2G15327
																									AT2G37060	NUCLEAR FACTOR Y, SUBUNIT B8 (NF-YB8)							AT2G15610
																									AT2G37370								AT2G16290
																									AT2G37530								AT2G16730	(BGAL13)
																									AT2G37540								AT2G16970	MATERNAL EFFECT EMBRYO ARREST 15 (MEE15)
																									AT2G37720	TRICHOME BIREFRINGENCE-LIKE 15 (TBL15)							AT2G17060
																									AT2G37800								AT2G17680
																									AT2G38060	PHOSPHATE TRANSPORTER 4;2 (PHT4;2)							AT2G17940
																									AT2G38120	AUXIN RESISTANT 1 (AUX1)							AT2G17950	WUSCHEL (WUS)
																									AT2G38320	TRICHOME BIREFRINGENCE-LIKE 34 (TBL34)							AT2G18060	VASCULAR RELATED NAC-DOMAIN PROTEIN 1 (VND1)
																									AT2G38970								AT2G18120	SHI-RELATED SEQUENCE 4 (SRS4)
																									AT2G39250	SCHNARCHZAPFEN (SNZ)							AT2G18360
																									AT2G40050								AT2G18370
																									AT2G40500								AT2G18380	GATA TRANSCRIPTION FACTOR 20 (GATA20)
																									AT2G40900								AT2G18480
																									AT2G41270								AT2G18500	OVATE FAMILY PROTEIN 7 (OFP7)
																									AT2G41280	(M10)							AT2G18570
																									AT2G41290	STRICTOSIDINE SYNTHASE-LIKE 2 (SSL2)							AT2G18620
																									AT2G41380								AT2G18720
																									AT2G41660	MIZU-KUSSEI 1 (MIZ1)							AT2G19045	RALF-LIKE 13 (RALFL13)
																									AT2G41810								AT2G19060
																									AT2G42040								AT2G19070	SPERMIDINE HYDROXYCINNAMOYL TRANSFERASE (SHT)
																									AT2G42350								AT2G19410
																									AT2G42620	MORE AXILLARY BRANCHES 2 (MAX2)							AT2G19500	CYTOKININ OXIDASE 2 (CKX2)
																									AT2G42990								AT2G20080
																									AT2G43520	TRYPSIN INHIBITOR PROTEIN 2 (TI2)							AT2G20100
																									AT2G43590								AT2G20800	NAD(P)H DEHYDROGENASE B4 (NDB4)
																									AT2G43870								AT2G21490	DEHYDRIN LEA (LEA)
																									AT2G43920	HARMLESS TO OZONE LAYER 2 (HOL2)							AT2G21900	WRKY DNA-BINDING PROTEIN 59 (WRKY59)
																									AT2G44110	MILDEW RESISTANCE LOCUS O 15 (MLO15)							AT2G21990
																									AT2G44370								AT2G22540	SHORT VEGETATIVE PHASE (SVP)
																									AT2G44480	BETA GLUCOSIDASE 17 (BGLU17)							AT2G22620
																									AT2G44798								AT2G22630	AGAMOUS-LIKE 17 (AGL17)
																									AT2G44810	DEFECTIVE ANTHER DEHISCENCE 1 (DAD1)							AT2G22800	(HAT9)
																									AT2G44910	HOMEOBOX-LEUCINE ZIPPER PROTEIN 4 (HB4)							AT2G23160
																									AT2G45050	GATA TRANSCRIPTION FACTOR 2 (GATA2)							AT2G23170	(GH3.3)
																									AT2G45135								AT2G23210
																									AT2G45430	AT-HOOK MOTIF NUCLEAR-LOCALIZED PROTEIN 22 (AHL22)							AT2G23220	CYTOCHROME P450, FAMILY 81, SUBFAMILY D, POLYPEPTIDE 6 (CYP81D6)
																									AT2G45750								AT2G23230
																									AT2G46140								AT2G23240	ARABIDOPSIS THALIANA METALLOTHIONEIN 4B (ATMT4B)
																									AT2G46685	MICRORNA166A (MIR166A)							AT2G23540
																									AT2G46690								AT2G23630	SKU5 SIMILAR 16 (sks16)
																									AT2G47030	(VGDH1)							AT2G23960
																									AT2G47240	LONG-CHAIN ACYL-COA SYNTHASE 1 (LACS1)							AT2G24260	LJRHL1-LIKE 1 (LRL1)
																									AT2G47270	UPBEAT1 (UPB1)							AT2G24430	NAC DOMAIN CONTAINING PROTEIN 38 (NAC038)
																									AT2G47460	MYB DOMAIN PROTEIN 12 (MYB12)							AT2G24696
																									AT3G01680	SIEVE-ELEMENT-OCCLUSION-RELATED 1 (SEOR1)							AT2G25120
																									AT3G01880								AT2G25150
																									AT3G02610								AT2G25330
																									AT3G02980	MEIOTIC CONTROL OF CROSSOVERS1 (MCC1)							AT2G25340	VESICLE-ASSOCIATED MEMBRANE PROTEIN 712 (VAMP712)
																									AT3G03470	CYTOCHROME P450, FAMILY 87, SUBFAMILY A, POLYPEPTIDE 9 (CYP89A9)							AT2G25790
																									AT3G03480	ACETYL COA:(Z)-3-HEXEN-1-OL ACETYLTRANSFERASE (CHAT)							AT2G26130
																									AT3G04190								AT2G26580	YABBY5 (YAB5)
																									AT3G06435								AT2G26695
																									AT3G07000								AT2G26700	PINOID2 (PID2)
																									AT3G08040	FERRIC REDUCTASE DEFECTIVE 3 (FRD3)							AT2G27250	CLAVATA3 (CLV3)
																									AT3G10116								AT2G27370	CASPARIAN STRIP MEMBRANE DOMAIN PROTEIN 3 (CASP3)
																									AT3G10190								AT2G27550	CENTRORADIALIS (ATC)
																									AT3G10600	CATIONIC AMINO ACID TRANSPORTER 7 (CAT7)							AT2G28490
																									AT3G10910								AT2G28510
																									AT3G10912	CONSERVED PEPTIDE UPSTREAM OPEN READING FRAME 63 (CPuORF63)							AT2G28610	PRESSED FLOWER (PRS)
																									AT3G11402								AT2G28810
																									AT3G11580								AT2G28870
																									AT3G11740								AT2G29125	ROTUNDIFOLIA LIKE 2 (RTFL2)
																									AT3G12090	TETRASPANIN6 (TET6)							AT2G29380	HIGHLY ABA-INDUCED PP2C GENE 3 (HAI3)
																									AT3G12203	SERINE CARBOXYPEPTIDASE-LIKE 17 (scpl17)							AT2G29440	GLUTATHIONE S-TRANSFERASE TAU 6 (GSTU6)
																									AT3G12410								AT2G29810
																									AT3G13510								AT2G30130	(ASL5)
																									AT3G13790	(ATBFRUCT1)							AT2G30300
																									AT3G14040								AT2G30310
																									AT3G14060								AT2G30432	TRICHOMELESS1 (TCL1)
																									AT3G14450	CTC-INTERACTING DOMAIN 9 (CID9)							AT2G30660
																									AT3G14880								AT2G30760
																									AT3G15280								AT2G31083	CLAVATA3/ESR-RELATED 5 (CLE5)
																									AT3G15370	EXPANSIN 12 (EXPA12)							AT2G31230	ETHYLENE-RESPONSIVE ELEMENT BINDING FACTOR 15 (ERF15)
																									AT3G15534								AT2G31690
																									AT3G15800								AT2G31990
																									AT3G15820	REDUCED OLEATE DESATURATION 1 (ROD1)							AT2G32370	HOMEODOMAIN GLABROUS 3 (HDG3)
																									AT3G16150	ASPARAGINASE B1 (ASPGB1)							AT2G32460	MYB DOMAIN PROTEIN 101 (MYB101)
																									AT3G16540	DEGP PROTEASE 11 (DegP11)							AT2G32620	CELLULOSE SYNTHASE-LIKE B (CSLB02)
																									AT3G16920	CHITINASE-LIKE PROTEIN 2 (CTL2)							AT2G32690	GLYCINE-RICH PROTEIN 23 (GRP23)
																									AT3G17080								AT2G32830	PHOSPHATE TRANSPORTER 1;5 (PHT1;5)
																									AT3G17110								AT2G32885
																									AT3G17185	TRANS-ACTING SIRNA3 (TAS3)							AT2G33160
																									AT3G19430								AT2G33520
																									AT3G19960	MYOSIN 1 (ATM1)							AT2G33780
																									AT3G20710								AT2G34100
																									AT3G20975								AT2G34110
																									AT3G21090	ATP-BINDING CASSETTE G15 (ABCG15)							AT2G34140
																									AT3G21210								AT2G34210
																									AT3G21270	DOF ZINC FINGER PROTEIN 2 (DOF2)							AT2G34320
																									AT3G21750	UDP-GLUCOSYL TRANSFERASE 71B1 (UGT71B1)							AT2G34790	MATERNAL EFFECT EMBRYO ARREST 23 (MEE23)
																									AT3G21790								AT2G34830	WRKY DNA-BINDING PROTEIN 35 (WRKY35)
																									AT3G21870	CYCLIN P2;1 (CYCP2;1)							AT2G34870	MATERNAL EFFECT EMBRYO ARREST 26 (MEE26)
																									AT3G22120	CELL WALL-PLASMA MEMBRANE LINKER PROTEIN (CWLP)							AT2G35270	GIANT KILLER (GIK)
																									AT3G22121								AT2G35612
																									AT3G22150								AT2G36190	CELL WALL INVERTASE 4 (cwINV4)
																									AT3G22640	(PAP85)							AT2G36420	TON1 RECRUITING MOTIF 27 (TRM27)
																									AT3G22830	HEAT SHOCK TRANSCRIPTION FACTOR A6B (HSFA6B)							AT2G37440
																									AT3G23060								AT2G37700
																									AT3G23090								AT2G37730
																									AT3G23230	TRANSCRIPTIONAL REGULATOR OF DEFENSE RESPONSE 1 (TDR1)							AT2G37740	ZINC-FINGER PROTEIN 10 (ZFP10)
																									AT3G23630	ISOPENTENYLTRANSFERASE 7 (IPT7)							AT2G38230	PYRIDOXINE BIOSYNTHESIS 1.1 (PDX1.1)
																									AT3G23955								AT2G38300
																									AT3G24065								AT2G38380
																									AT3G24220	NINE-CIS-EPOXYCAROTENOID DIOXYGENASE 6 (NCED6)							AT2G38390
																									AT3G24640								AT2G38510
																									AT3G24670								AT2G39010	PLASMA MEMBRANE INTRINSIC PROTEIN 2E (PIP2E)
																									AT3G25420	SERINE CARBOXYPEPTIDASE-LIKE 21 (scpl21)							AT2G39030	N-ACETYLTRANSFERASE ACTIVITY 1 (NATA1)
																									AT3G25620	ATP-BINDING CASSETTE G21 (ABCG21)							AT2G39060	(SWEET9)
																									AT3G25730	ETHYLENE RESPONSE DNA BINDING FACTOR 3 (EDF3)							AT2G39350	ATP-BINDING CASSETTE G1 (ABCG1)
																									AT3G25795								AT2G40170	LATE EMBRYOGENESIS ABUNDANT 6 (GEA6)
																									AT3G26120	TERMINAL EAR1-LIKE 1 (TEL1)							AT2G40250
																									AT3G26190	CYTOCHROME P450, FAMILY 71, SUBFAMILY B, POLYPEPTIDE 21 (CYP71B21)							AT2G40260
																									AT3G26200	CYTOCHROME P450, FAMILY 71, SUBFAMILY B, POLYPEPTIDE 22 (CYP71B22)							AT2G41130
																									AT3G26460								AT2G41225
																									AT3G26590								AT2G41360
																									AT3G26610								AT2G41370	BLADE ON PETIOLE2 (BOP2)
																									AT3G27480								AT2G41870
																									AT3G27660	OLEOSIN 4 (OLEO4)							AT2G42140
																									AT3G27785	MYB DOMAIN PROTEIN 118 (MYB118)							AT2G42410	ZINC FINGER PROTEIN 11 (ZFP11)
																									AT3G28345	ATP-BINDING CASSETTE B15 (ABCB15)							AT2G42560
																									AT3G28611								AT2G42610	LIGHT SENSITIVE HYPOCOTYLS 10 (LSH10)
																									AT3G28857	PACLOBUTRAZOL RESISTANCE 5 (PRE5)							AT2G42660
																									AT3G29030	EXPANSIN A5 (EXPA5)							AT2G42830	SHATTERPROOF 2 (SHP2)
																									AT3G29250	SHORT-CHAIN DEHYDROGENASE REDUCTASE 4 (SDR4)							AT2G42990
																									AT3G30460								AT2G43060	ILI1 BINDING BHLH 1 (IBH1)
																									AT3G44300	NITRILASE 2 (NIT2)							AT2G43140
																									AT3G44990	XYLOGLUCAN ENDO-TRANSGLYCOSYLASE-RELATED 8 (XTR8)							AT2G43620
																									AT3G45000	(VPS24.2)							AT2G44030
																									AT3G46310								AT2G44581
																									AT3G47540								AT2G44990	CAROTENOID CLEAVAGE DIOXYGENASE 7 (CCD7)
																									AT3G48630								AT2G45130	SPX DOMAIN GENE 3 (SPX3)
																									AT3G48700	CARBOXYESTERASE 13 (CXE13)							AT2G45190	ABNORMAL FLORAL ORGANS (AFO)
																									AT3G49115								AT2G45420	LOB DOMAIN-CONTAINING PROTEIN 18 (LBD18)
																									AT3G49280								AT2G45430	AT-HOOK MOTIF NUCLEAR-LOCALIZED PROTEIN 22 (AHL22)
																									AT3G49760	BASIC LEUCINE-ZIPPER 5 (bZIP5)							AT2G46750	L -GULONO-1,4-LACTONE ( L -GULL) OXIDASE 2 (GULLO2)
																									AT3G49820								AT2G46760	L -GULONO-1,4-LACTONE ( L -GULL) OXIDASE 6 (GULLO6)
																									AT3G49950								AT2G46870	NGATHA1 (NGA1)
																									AT3G50160								AT2G47530
																									AT3G50337								AT2G47810	NUCLEAR FACTOR Y, SUBUNIT B5 (NF-YB5)
																									AT3G50760	GALACTURONOSYLTRANSFERASE-LIKE 2 (GATL2)							AT3G01080	WRKY DNA-BINDING PROTEIN 58 (WRKY58)
																									AT3G50890	HOMEOBOX PROTEIN 28 (HB28)							AT3G01085
																									AT3G51070								AT3G01220	HOMEOBOX PROTEIN 20 (HB20)
																									AT3G51075								AT3G01230
																									AT3G51860	CATION EXCHANGER 3 (CAX3)							AT3G02670
																									AT3G51895	SULFATE TRANSPORTER 3;1 (SULTR3;1)							AT3G02970	EXORDIUM LIKE 6 (EXL6)
																									AT3G53640								AT3G03200	NAC DOMAIN CONTAINING PROTEIN 45 (NAC045)
																									AT3G53720	CATION/H+ EXCHANGER 20 (CHX20)							AT3G03240
																									AT3G54820	PLASMA MEMBRANE INTRINSIC PROTEIN 2;5 (PIP2;5)							AT3G03270
																									AT3G54940								AT3G03280
																									AT3G55940								AT3G03660	WUSCHEL RELATED HOMEOBOX 11 (WOX11)
																									AT3G57540								AT3G03730
																									AT3G58000								AT3G03760	LOB DOMAIN-CONTAINING PROTEIN 20 (LBD20)
																									AT3G58860								AT3G04290	LI-TOLERANT LIPASE 1 (LTL1)
																									AT3G59460								AT3G04360
																									AT3G59845								AT3G04510	LIGHT SENSITIVE HYPOCOTYLS 2 (LSH2)
																									AT3G59930								AT3G04570	AT-HOOK MOTIF NUCLEAR-LOCALIZED PROTEIN 19 (AHL19)
																									AT3G60140	DARK INDUCIBLE 2 (DIN2)							AT3G04990
																									AT3G60390	HOMEOBOX-LEUCINE ZIPPER PROTEIN 3 (HAT3)							AT3G05950
																									AT3G60500	ECERIFERUM 7 (CER7)							AT3G06962
																									AT3G60520								AT3G08040	FERRIC REDUCTASE DEFECTIVE 3 (FRD3)
																									AT3G60590								AT3G09220	LACCASE 7 (LAC7)
																									AT3G60690								AT3G10000	EMBRYO SAC DEVELOPMENT ARREST 31 (EDA31)
																									AT3G61182	LOW-MOLECULAR-WEIGHT CYSTEINE-RICH 54 (LCR54)							AT3G10750
																									AT3G61185								AT3G11430	GLYCEROL-3-PHOSPHATE ACYLTRANSFERASE 5 (GPAT5)
																									AT3G61270								AT3G11930
																									AT3G61721								AT3G12450
																									AT3G61723								AT3G12730
																									AT3G61840								AT3G12890	ACTIVATOR OF SPOMIN::LUC2 (ASML2)
																									AT3G61920								AT3G13010
																									AT3G62680	PROLINE-RICH PROTEIN 3 (PRP3)							AT3G13140
																									AT3G62820								AT3G13540	MYB DOMAIN PROTEIN 5 (MYB5)
																									AT3G62990								AT3G13650
																									AT4G00310	EMBRYO SAC DEVELOPMENT ARREST 8 (EDA8)							AT3G13660
																									AT4G00920								AT3G15250
																									AT4G01350								AT3G16400	NITRILE SPECIFIER PROTEIN 1 (NSP1)
																									AT4G01390								AT3G16410	NITRILE SPECIFIER PROTEIN 4 (NSP4)
																									AT4G01410								AT3G16440	MYROSINASE-BINDING PROTEIN-LIKE PROTEIN-300B (MLP-300B)
																									AT4G02100								AT3G16580
																									AT4G02670	INDETERMINATE(ID)-DOMAIN 12 (IDD12)							AT3G17260
																									AT4G03039	MICRORNA826A (MIR826A)							AT3G17500
																									AT4G03040								AT3G17520
																									AT4G03500								AT3G17530
																									AT4G03540								AT3G18400	NAC DOMAIN CONTAINING PROTEIN 58 (NAC058)
																									AT4G04840	METHIONINE SULFOXIDE REDUCTASE B6 (MSRB6)							AT3G18470
																									AT4G08620	SULPHATE TRANSPORTER 1;1 (SULTR1;1)							AT3G18660	PLANT GLYCOGENIN-LIKE STARCH INITIATION PROTEIN 1 (PGSIP1)
																									AT4G08750								AT3G18670
																									AT4G08867								AT3G18955
																									AT4G09740	GLYCOSYL HYDROLASE 9B14 (GH9B14)							AT3G18957
																									AT4G09920								AT3G19070
																									AT4G10740								AT3G19920
																									AT4G12130								AT3G20460
																									AT4G12290								AT3G20640
																									AT4G12470	AZELAIC ACID INDUCED 1 (AZI1)							AT3G20750	GATA TRANSCRIPTION FACTOR 29 (GATA29)
																									AT4G13700	PURPLE ACID PHOSPHATASE 23 (PAP23)							AT3G20760
																									AT4G14020								AT3G20880	WIP DOMAIN PROTEIN 4 (WIP4)
																									AT4G14315								AT3G21370	BETA GLUCOSIDASE 19 (BGLU19)
																									AT4G14320								AT3G21371
																									AT4G14400	ACCELERATED CELL DEATH 6 (ACD6)							AT3G21380
																									AT4G14690	EARLY LIGHT-INDUCIBLE PROTEIN 2 (ELIP2)							AT3G21720	ISOCITRATE LYASE (ICL)
																									AT4G14815								AT3G22250
																									AT4G14940	AMINE OXIDASE 1 (AO1)							AT3G22740	HOMOCYSTEINE S-METHYLTRANSFERASE 3 (HMT3)
																									AT4G15490	(UGT84A3)							AT3G22800
																									AT4G16267								AT3G22886	MICRORNA167A (MIR167A)
																									AT4G16270								AT3G22910
																									AT4G16820	PHOSPHOLIPASE A I BETA 2 (PLA-I{beta]2)							AT3G23290	LIGHT SENSITIVE HYPOCOTYLS 4 (LSH4)
																									AT4G16990	RESISTANCE TO LEPTOSPHAERIA MACULANS 3 (RLM3)							AT3G23430	PHOSPHATE 1 (PHO1)
																									AT4G17030	EXPANSIN-LIKE B1 (EXLB1)							AT3G24230
																									AT4G17580								AT3G24240
																									AT4G18250								AT3G24250
																									AT4G18350	NINE-CIS-EPOXYCAROTENOID DIOXYGENASE 2 (NCED2)							AT3G24300	AMMONIUM TRANSPORTER 1;3 (AMT1;3)
																									AT4G18550	DAD1-LIKE SEEDING ESTABLISHMENT-RELATED LIPASE (DSEL)							AT3G24400	PROLINE-RICH EXTENSIN-LIKE RECEPTOR KINASE 2 (PERK2)
																									AT4G18620	PYR1-LIKE 13 (PYL13)							AT3G24690
																									AT4G18680								AT3G25260
																									AT4G19520								AT3G25490
																									AT4G20450								AT3G25710	BASIC HELIX-LOOP-HELIX 32 (BHLH32)
																									AT4G21080								AT3G26140
																									AT4G21200	GIBBERELLIN 2-OXIDASE 8 (GA2OX8)							AT3G26550
																									AT4G21370	PSEUDOGENE OF S-LOCUS RECEPTOR KINASE A (PSEUDOSRKA)							AT3G26760
																									AT4G21750	MERISTEM LAYER 1 (ATML1)							AT3G26790	FUSCA 3 (FUS3)
																									AT4G21903								AT3G26940	CONSTITUTIVE DIFFERENTIAL GROWTH 1 (CDG1)
																									AT4G21926								AT3G27490
																									AT4G21930								AT3G27650	LOB DOMAIN-CONTAINING PROTEIN 25 (LBD25)
																									AT4G22520								AT3G27809
																									AT4G22530								AT3G27810	MYB DOMAIN PROTEIN 21 (MYB21)
																									AT4G23870								AT3G28230
																									AT4G24026								AT3G28345	ATP-BINDING CASSETTE B15 (ABCB15)
																									AT4G24030								AT3G28390	ATP-BINDING CASSETTE B18 (ABCB18)
																									AT4G24080	ALDOLASE LIKE (ALL1)							AT3G28415	ATP-BINDING CASSETTE B22 (ABCB22)
																									AT4G24140								AT3G28917	MINI ZINC FINGER 2 (MIF2)
																									AT4G24340								AT3G29410
																									AT4G24420								AT3G29635
																									AT4G24660	HOMEOBOX PROTEIN 22 (HB22)							AT3G29636
																									AT4G25020								AT3G30350	ROOT MERISTEM GROWTH FACTOR 4 (RGF4)
																									AT4G25040								AT3G30530	BASIC LEUCINE-ZIPPER 42 (bZIP42)
																									AT4G25090								AT3G30724
																									AT4G25250								AT3G30725	GLUTAMINE DUMPER 6 (GDU6)
																									AT4G25790								AT3G31005
																									AT4G26150	CYTOKININ-RESPONSIVE GATA FACTOR 1 (CGA1)							AT3G31051
																									AT4G28040								AT3G42180
																									AT4G28410								AT3G42806
																									AT4G28520	CRUCIFERIN 3 (CRU3)							AT3G42960	TAPETUM 1 (ATA1)
																									AT4G28530	NAC DOMAIN CONTAINING PROTEIN 74 (NAC074)							AT3G43200
																									AT4G28680	L-TYROSINE DECARBOXYLASE (TYRDC)							AT3G43270
																									AT4G29110								AT3G44700
																									AT4G29340	PROFILIN 4 (PRF4)							AT3G44704
																									AT4G29740	CYTOKININ OXIDASE 4 (CKX4)							AT3G44705
																									AT4G30064	LOW-MOLECULAR-WEIGHT CYSTEINE-RICH 61 (LCR61)							AT3G44755
																									AT4G30180								AT3G44830
																									AT4G30230								AT3G45060	HIGH AFFINITY NITRATE TRANSPORTER 2.6 (NRT2.6)
																									AT4G30350								AT3G45160
																									AT4G30970								AT3G45170	GATA TRANSCRIPTION FACTOR 14 (GATA14)
																									AT4G30975								AT3G45250
																									AT4G30980	LJRHL1-LIKE 2 (LRL2)							AT3G45530
																									AT4G31250								AT3G46070
																									AT4G31390	ABC1-LIKE KINASE RELATED TO CHLOROPHYLL DEGRADATION AND OXIDATIVE STRESS 1 (ACDO1)							AT3G46080
																									AT4G32650	POTASSIUM CHANNEL IN ARABIDOPSIS THALIANA 3 (KAT3)							AT3G46250
																									AT4G32870								AT3G46270
																									AT4G33040								AT3G46613	ROTUNDIFOLIA LIKE 4 (RTFL4)
																									AT4G33720								AT3G46910
																									AT4G33930								AT3G47020
																									AT4G34170								AT3G47030
																									AT4G34790								AT3G47400
																									AT4G34970	ACTIN DEPOLYMERIZING FACTOR 9 (ADF9)							AT3G47410
																									AT4G35010	BETA-GALACTOSIDASE 11 (BGAL11)							AT3G47770	ATP-BINDING CASSETTE A6 (ABCA6)
																									AT4G35060	HEAVY METAL ASSOCIATED ISOPRENYLATED PLANT PROTEIN 25 (HIPP25)							AT3G47980
																									AT4G37400	CYTOCHROME P450, FAMILY 81, SUBFAMILY F, POLYPEPTIDE 3 (CYP81F3)							AT3G48270	CYTOCHROME P450, FAMILY 71, SUBFAMILY A, POLYPEPTIDE 26 (CYP71A26)
																									AT4G37730	BASIC LEUCINE-ZIPPER 7 (bZIP7)							AT3G48510
																									AT4G37800	XYLOGLUCAN ENDOTRANSGLUCOSYLASE/HYDROLASE 7 (XTH7)							AT3G48950
																									AT4G37940	AGAMOUS-LIKE 21 (AGL21)							AT3G49150
																									AT4G37990	ELICITOR-ACTIVATED GENE 3-2 (ELI3-2)							AT3G49190
																									AT4G38000	DNA BINDING WITH ONE FINGER 4.7 (DOF4.7)							AT3G49450
																									AT4G38420	SKU5 SIMILAR 9 (sks9)							AT3G49630
																									AT4G38870								AT3G49700	1-AMINOCYCLOPROPANE-1-CARBOXYLATE SYNTHASE 9 (ACS9)
																									AT4G39950	CYTOCHROME P450, FAMILY 79, SUBFAMILY B, POLYPEPTIDE 2 (CYP79B2)							AT3G49940	LOB DOMAIN-CONTAINING PROTEIN 38 (LBD38)
																									AT5G01280								AT3G50130
																									AT5G01740								AT3G50140
																									AT5G02230								AT3G50170
																									AT5G02260	EXPANSIN A9 (EXPA9)							AT3G50180
																									AT5G02420								AT3G50330	HECATE 2 (HEC2)
																									AT5G02500	HEAT SHOCK COGNATE PROTEIN 70-1 (HSC70-1)							AT3G50480	HOMOLOG OF RPW8 4 (HR4)
																									AT5G02640								AT3G50870	MONOPOLE (MNP)
																									AT5G03260	LACCASE 11 (LAC11)							AT3G50980	DEHYDRIN XERO 1 (XERO1)
																									AT5G03795								AT3G50990
																									AT5G04230	PHENYL ALANINE AMMONIA-LYASE 3 (PAL3)							AT3G51060	STYLISH 1 (STY1)
																									AT5G05260	CYTOCHROME P450 79A2 (CYP79A2)							AT3G51190
																									AT5G05340	PEROXIDASE 52 (PRX52)							AT3G51810	LATE EMBRYOGENESIS ABUNDANT 1 (EM1)
																									AT5G06040								AT3G52550
																									AT5G06250	DEVELOPMENT-RELATED PCG TARGET IN THE APEX 4 (DPA4)							AT3G52780	(PAP20)
																									AT5G06570								AT3G53015	MICRORNA771A (MIR771A)
																									AT5G06710	HOMEOBOX FROM ARABIDOPSIS THALIANA (HAT14)							AT3G53016	MICRORNA851A (MIR851A)
																									AT5G07030								AT3G53040
																									AT5G07630								AT3G53790	TRF-LIKE 4 (TRFL4)
																									AT5G07990	TRANSPARENT TESTA 7 (TT7)							AT3G54340	APETALA 3 (AP3)
																									AT5G09320	(VPS9B)							AT3G54450
																									AT5G09570								AT3G55110	ATP-BINDING CASSETTE G18 (ABCG18)
																									AT5G09805	INFLORESCENCE DEFICIENT IN ABSCISSION (IDA)-LIKE 3 (IDL3)							AT3G55180
																									AT5G10100	TREHALOSE-6-PHOSPHATE PHOSPHATASE I (TPPI)							AT3G55540
																									AT5G11230								AT3G55646
																									AT5G11550								AT3G55700
																									AT5G11870								AT3G56220
																									AT5G12330	LATERAL ROOT PRIMORDIUM 1 (LRP1)							AT3G56630	CYTOCHROME P450, FAMILY 94, SUBFAMILY D, POLYPEPTIDE 2 (CYP94D2)
																									AT5G13170	SENESCENCE-ASSOCIATED GENE 29 (SAG29)							AT3G56770
																									AT5G13250								AT3G57130	BLADE ON PETIOLE 1 (BOP1)
																									AT5G13880								AT3G57670	NO TRANSMITTING TRACT (NTT)
																									AT5G14070	(ROXY2)							AT3G57680
																									AT5G14345	EARLY NODULIN-LIKE PROTEIN 21 (ENODL21)							AT3G58450
																									AT5G14920								AT3G58780	SHATTERPROOF 1 (SHP1)
																									AT5G15030								AT3G58960
																									AT5G15180								AT3G59010	PECTIN METHYLESTERASE 61 (PME61)
																									AT5G15240								AT3G59440
																									AT5G15380	DOMAINS REARRANGED METHYLASE 1 (DRM1)							AT3G59590
																									AT5G15650	REVERSIBLY GLYCOSYLATED POLYPEPTIDE 2 (RGP2)							AT3G59710
																									AT5G15830	BASIC LEUCINE-ZIPPER 3 (bZIP3)							AT3G60500	ECERIFERUM 7 (CER7)
																									AT5G16900								AT3G60720	PLASMODESMATA-LOCATED PROTEIN 8 (PDLP8)
																									AT5G17540								AT3G60870	AT-HOOK MOTIF NUCLEAR-LOCALIZED PROTEIN 18 (AHL18)
																									AT5G17980								AT3G61118
																									AT5G18460								AT3G61290
																									AT5G18840								AT3G61340
																									AT5G19170								AT3G61470	PHOTOSYSTEM I LIGHT HARVESTING COMPLEX GENE 2 (LHCA2)
																									AT5G19730								AT3G61850	DOF AFFECTING GERMINATION 1 (DAG1)
																									AT5G19875								AT3G62340	(WRKY68)
																									AT5G20100								AT3G62529
																									AT5G20110								AT3G62670	RESPONSE REGULATOR 20 (RR20)
																									AT5G20240	PISTILLATA (PI)							AT4G00120	INDEHISCENT (IND)
																									AT5G20690								AT4G00180	YABBY3 (YAB3)
																									AT5G20740								AT4G00220	JAGGED LATERAL ORGANS (JLO)
																									AT5G20790								AT4G00250
																									AT5G22090								AT4G00260	MATERNAL EFFECT EMBRYO ARREST 45 (MEE45)
																									AT5G22390								AT4G00390
																									AT5G22720								AT4G00400	GLYCEROL-3-PHOSPHATE ACYLTRANSFERASE 8 (GPAT8)
																									AT5G22900	CATION/H+ EXCHANGER 3 (CHX3)							AT4G00480	(ATMYC1)
																									AT5G22910	CATION/H+ EXCHANGER 9 (CHX9)							AT4G01430
																									AT5G23235								AT4G01450
																									AT5G23360								AT4G01500	NGATHA4 (NGA4)
																									AT5G23940	PERMEABLE LEAVES3 (PEL3)							AT4G01520	NAC DOMAIN CONTAINING PROTEIN 67 (NAC067)
																									AT5G23980	FERRIC REDUCTION OXIDASE 4 (FRO4)							AT4G01525	SADHU NON-CODING RETROTRANSPOSON 5-1 (SADHU5-1)
																									AT5G24110	WRKY DNA-BINDING PROTEIN 30 (WRKY30)							AT4G01770	RHAMNOGALACTURONAN XYLOSYLTRANSFERASE 1 (RGXT1)
																									AT5G24140	SQUALENE MONOOXYGENASE 2 (SQP2)							AT4G01895
																									AT5G24160	SQUALENE MONOXYGENASE 6 (SQE6)							AT4G02160
																									AT5G24210								AT4G02670	INDETERMINATE(ID)-DOMAIN 12 (IDD12)
																									AT5G24420	6-PHOSPHOGLUCONOLACTONASE 5 (PGL5)							AT4G02690
																									AT5G24655	RESPONSE TO LOW SULFUR 4 (LSU4)							AT4G02700	SULFATE TRANSPORTER 3;2 (SULTR3;2)
																									AT5G24880								AT4G02770	PHOTOSYSTEM I SUBUNIT D-1 (PSAD-1)
																									AT5G25120	YTOCHROME P450, FAMILY 71, SUBFAMILY B, POLYPEPTIDE 11 (CYP71B11)							AT4G02780	GA REQUIRING 1 (GA1)
																									AT5G25230								AT4G04450	(WRKY42)
																									AT5G25300								AT4G04500	CYSTEINE-RICH RLK (RECEPTOR-LIKE PROTEIN KINASE) 37 (CRK37)
																									AT5G26340	(MSS1)							AT4G04930	(DES-1-LIKE)
																									AT5G26800								AT4G04990
																									AT5G27690								AT4G05270
																									AT5G28285								AT4G05430
																									AT5G28635								AT4G05470
																									AT5G35777								AT4G05475
																									AT5G36220	CYTOCHROME P450, FAMILY 81, SUBFAMILY D, POLYPEPTIDE 1 (CYP81D1)							AT4G05490
																									AT5G37550								AT4G08150	KNOTTED-LIKE FROM ARABIDOPSIS THALIANA (KNAT1)
																									AT5G38160								AT4G08840	PUMILIO 11 (PUM11)
																									AT5G38280	PR5-LIKE RECEPTOR KINASE (PR5K)							AT4G09530
																									AT5G38396								AT4G09600	GAST1 PROTEIN HOMOLOG 3 (GASA3)
																									AT5G38420	RUBISCO SMALL SUBUNIT 2B (RBCS2B)							AT4G09610	GAST1 PROTEIN HOMOLOG 2 (GASA2)
																									AT5G38430	RUBISCO SMALL SUBUNIT 1B (RBCS1B)							AT4G09965
																									AT5G39580								AT4G10310	HIGH-AFFINITY K+ TRANSPORTER 1 (HKT1)
																									AT5G39850								AT4G10490
																									AT5G39860	PACLOBUTRAZOL RESISTANCE1 (PRE1)							AT4G11020
																									AT5G42460								AT4G11030
																									AT5G43020								AT4G11040
																									AT5G43870								AT4G11170
																									AT5G44160	NUTCRACKER (NUC)							AT4G11310
																									AT5G44220								AT4G11320
																									AT5G44255								AT4G11340
																									AT5G44418								AT4G11610
																									AT5G44420	PLANT DEFENSIN 1.2 (PDF1.2)							AT4G12050
																									AT5G45380	DEGRADATION OF UREA 3 (DUR3)							AT4G12480	EARLY ARABIDOPSIS ALUMINUM INDUCED 1 (EARLI1)
																									AT5G45640								AT4G13480	MYB DOMAIN PROTEIN 79 (MYB79)
																									AT5G45830	DELAY OF GERMINATION 1 (DOG1)							AT4G13495
																									AT5G46050	PEPTIDE TRANSPORTER 3 (PTR3)							AT4G13960
																									AT5G46140								AT4G14140	DNA METHYLTRANSFERASE 2 (DMT2)
																									AT5G46270								AT4G14465	AT-HOOK MOTIF NUCLEAR-LOCALIZED PROTEIN 20 (AHL20)
																									AT5G47130								AT4G15160
																									AT5G47306								AT4G15280	UDP-GLUCOSYL TRANSFERASE 71B5 (UGT71B5)
																									AT5G48375	THIOGLUCOSIDE GLUCOSIDASE 3 (TGG3)							AT4G15330	CYTOCHROME P450, FAMILY 705, SUBFAMILY A, POLYPEPTIDE 1 (CYP705A1)
																									AT5G48420								AT4G15340	PENTACYCLIC TRITERPENE SYNTHASE 1 (PEN1)
																									AT5G49180								AT4G15350	CYTOCHROME P450, FAMILY 705, SUBFAMILY A, POLYPEPTIDE 2 (CYP705A2)
																									AT5G50090								AT4G15370	BARUOL SYNTHASE 1 (BARS1)
																									AT5G50750	REVERSIBLY GLYCOSYLATED POLYPEPTIDE 4 (RGP4)							AT4G15380	CYTOCHROME P450, FAMILY 705, SUBFAMILY A, POLYPEPTIDE 4 (CYP705A4)
																									AT5G50880								AT4G15390
																									AT5G51795								AT4G15400	BRASSINOSTEROID INACTIVATOR1 (BIA1)
																									AT5G52415								AT4G15660
																									AT5G52450								AT4G15680
																									AT5G53380								AT4G15700
																									AT5G53902	U3 SMALL NUCLEOLAR RNAB (U3B)							AT4G15960
																									AT5G54250	CYCLIC NUCLEOTIDE-GATED CATION CHANNEL 4 (CNGC4)							AT4G16040
																									AT5G54620								AT4G16045
																									AT5G56490	L -GULONO-1,4-LACTONE ( L -GULL) OXIDASE 4 (GULLO4)							AT4G16460
																									AT5G57670								AT4G16550
																									AT5G57785								AT4G16560
																									AT5G58660								AT4G17695	KANADI 3 (KAN3)
																									AT5G59220	HIGHLY ABA-INDUCED PP2C GENE 1 (HAI1)							AT4G17710	HOMEODOMAIN GLABROUS 4 (HDG4)
																									AT5G59930								AT4G17785	MYB DOMAIN PROTEIN 39 (MYB39)
																									AT5G59990								AT4G17810
																									AT5G61610								AT4G18330
																									AT5G61850	LEAFY (LFY)							AT4G18335
																									AT5G62280								AT4G18340
																									AT5G63715	MICRORNA166G (MIR166G)							AT4G18610	LIGHT SENSITIVE HYPOCOTYLS 9 (LSH9)
																									AT5G64870								AT4G18650
																									AT5G65280	GCR2-LIKE 1 (GCL1)							AT4G18860
																									AT5G65850								AT4G18920
																									AT5G66300	NAC DOMAIN CONTAINING PROTEIN 105 (NAC105)							AT4G18980	ATS40-3 (AtS40-3)
																																	AT4G18990	XYLOGLUCAN ENDOTRANSGLUCOSYLASE/HYDROLASE 29 (XTH29)
																																	AT4G19000	(IWS2)
																																	AT4G19690	IRON-REGULATED TRANSPORTER 1 (IRT1)
																																	AT4G19720
																																	AT4G19740
																																	AT4G19750
																																	AT4G19760
																																	AT4G19940
																																	AT4G19970
																																	AT4G19980
																																	AT4G20230
																																	AT4G21010
																																	AT4G21020
																																	AT4G21750	MERISTEM LAYER 1 (ATML1)
																																	AT4G21830	METHIONINE SULFOXIDE REDUCTASE B7 (MSRB7)
																																	AT4G22020
																																	AT4G22070	WRKY DNA-BINDING PROTEIN 31 (WRKY31)
																																	AT4G22080	ROOT HAIR SPECIFIC 14 (RHS14)
																																	AT4G22090
																																	AT4G22110
																																	AT4G22510
																																	AT4G22513
																																	AT4G22600
																																	AT4G22680	MYB DOMAIN PROTEIN 85 (MYB85)
																																	AT4G23110
																																	AT4G23520
																																	AT4G23550	(WRKY29)
																																	AT4G23590
																																	AT4G23700	CATION/H+ EXCHANGER 17 (CHX17)
																																	AT4G23880
																																	AT4G24000	CELLULOSE SYNTHASE LIKE G2 (CSLG2)
																																	AT4G24140
																																	AT4G24540	AGAMOUS-LIKE 24 (AGL24)
																																	AT4G26255
																																	AT4G26260	MYO-INOSITOL OXYGENASE 4 (MIOX4)
																																	AT4G28750	PSA E1 KNOCKOUT (PSAE-1)
																																	AT4G28840
																																	AT4G28850	XYLOGLUCAN ENDOTRANSGLUCOSYLASE/HYDROLASE 26 (XTH26)
																																	AT4G28940
																																	AT4G29030
																																	AT4G29230	NAC DOMAIN CONTAINING PROTEIN 75 (NAC075)
																																	AT4G29570
																																	AT4G29580
																																	AT4G29620
																																	AT4G29630
																																	AT4G29640
																																	AT4G29650
																																	AT4G31380	FPF1-LIKE PROTEIN 1 (FLP1)
																																	AT4G31900	PICKLE RELATED 2 (PKR2)
																																	AT4G31910
																																	AT4G32230
																																	AT4G32280	INDOLE-3-ACETIC ACID INDUCIBLE 29 (IAA29)
																																	AT4G32380
																																	AT4G32540	YUCCA 1 (YUC1)
																																	AT4G33800
																																	AT4G33830
																																	AT4G33880	ROOT HAIR DEFECTIVE 6-LIKE 2 (RSL2)
																																	AT4G34320
																																	AT4G34419
																																	AT4G34520	3-KETOACYL-COA SYNTHASE 18 (KCS18)
																																	AT4G35150
																																	AT4G35160
																																	AT4G35170
																																	AT4G35380
																																	AT4G35690
																																	AT4G35710
																																	AT4G35720
																																	AT4G35733
																																	AT4G36260	STYLISH 2 (STY2)
																																	AT4G36600
																																	AT4G36610
																																	AT4G36620	GATA TRANSCRIPTION FACTOR 19 (GATA19)
																																	AT4G36740	HOMEOBOX PROTEIN 40 (HB40)
																																	AT4G36870	BEL1-LIKE HOMEODOMAIN 2 (BLH2)
																																	AT4G37060	PATATIN-LIKE PROTEIN 5 (PLP5)
																																	AT4G37390	(BRU6)
																																	AT4G37400	CYTOCHROME P450, FAMILY 81, SUBFAMILY F, POLYPEPTIDE 3 (CYP81F3)
																																	AT4G37950
																																	AT4G38190	CELLULOSE SYNTHASE LIKE D4 (CSLD4)
																																	AT4G38340
																																	AT4G39410	WRKY DNA-BINDING PROTEIN 13 (WRKY13)
																																	AT4G39650	GAMMA-GLUTAMYL TRANSPEPTIDASE 2 (GGT2)
																																	AT4G39750
																																	AT4G39753
																																	AT5G01190	LACCASE 10 (LAC10)
																																	AT5G01370	ALC-INTERACTING PROTEIN 1 (ACI1)
																																	AT5G02340
																																	AT5G02350
																																	AT5G03000
																																	AT5G03150	JACKDAW (JKD)
																																	AT5G03590
																																	AT5G03600
																																	AT5G03680	PETAL LOSS (PTL)
																																	AT5G03810
																																	AT5G03820
																																	AT5G03840	TERMINAL FLOWER 1 (TFL1)
																																	AT5G04275	MICRORNA172B (MIR172B)
																																	AT5G04690
																																	AT5G04960
																																	AT5G05020
																																	AT5G05040
																																	AT5G05340	PEROXIDASE 52 (PRX52)
																																	AT5G05720
																																	AT5G05770	WUSCHEL RELATED HOMEOBOX 7 (WOX7)
																																	AT5G05790
																																	AT5G05965
																																	AT5G06250	DEVELOPMENT-RELATED PCG TARGET IN THE APEX 4 (DPA4)
																																	AT5G06330
																																	AT5G06380
																																	AT5G06730
																																	AT5G06839	TGACG (TGA) MOTIF-BINDING PROTEIN 10 (TGA10)
																																	AT5G07050
																																	AT5G07230
																																	AT5G07475
																																	AT5G07510	GLYCINE-RICH PROTEIN 14 (GRP14)
																																	AT5G07520	GLYCINE-RICH PROTEIN 18 (GRP18)
																																	AT5G07530	GLYCINE RICH PROTEIN 17 (GRP17)
																																	AT5G07540	GLYCINE-RICH PROTEIN 16 (GRP16)
																																	AT5G07550	GLYCINE-RICH PROTEIN 19 (GRP19)
																																	AT5G07560	GLYCINE-RICH PROTEIN 20 (GRP20)
																																	AT5G07780
																																	AT5G07800
																																	AT5G07990	TRANSPARENT TESTA 7 (TT7)
																																	AT5G08150	SUPPRESSOR OF PHYTOCHROME B 5 (SOB5)
																																	AT5G09210
																																	AT5G09480
																																	AT5G09500
																																	AT5G09730	BETA-XYLOSIDASE 3 (BXL3)
																																	AT5G09750	HECATE 3 (HEC3)
																																	AT5G09805	INFLORESCENCE DEFICIENT IN ABSCISSION (IDA)-LIKE 3 (IDL3)
																																	AT5G10170	MYO-INOSITOL-1-PHOSPHATE SYNTHASE 3 (MIPS3)
																																	AT5G10580
																																	AT5G11130
																																	AT5G11190	SHINE2 (SHN2)
																																	AT5G11540	L -GULONO-1,4-LACTONE ( L -GULL) OXIDASE 3 (GULLO3)
																																	AT5G12270
																																	AT5G12870	MYB DOMAIN PROTEIN 46 (MYB46)
																																	AT5G13130
																																	AT5G13250
																																	AT5G14340	MYB DOMAIN PROTEIN 40 (MYB40)
																																	AT5G14860
																																	AT5G15100	PIN-FORMED 8 (PIN8)
																																	AT5G15150	HOMEOBOX 3 (HB-3)
																																	AT5G15160	BANQUO 2 (BNQ2)
																																	AT5G15660
																																	AT5G15670
																																	AT5G16500
																																	AT5G16600	MYB DOMAIN PROTEIN 43 (MYB43)
																																	AT5G16920
																																	AT5G17110
																																	AT5G17120
																																	AT5G17330	GLUTAMATE DECARBOXYLASE (GAD)
																																	AT5G17430	BABY BOOM (BBM)
																																	AT5G17500
																																	AT5G17700
																																	AT5G17720
																																	AT5G17810	WUSCHEL RELATED HOMEOBOX 12 (WOX12)
																																	AT5G17970
																																	AT5G18450
																																	AT5G18560	(PUCHI)
																																	AT5G19560	ROP UANINE NUCLEOTIDE EXCHANGE FACTOR 10 (ROPGEF10)
																																	AT5G19810
																																	AT5G20240	PISTILLATA (PI)
																																	AT5G20370
																																	AT5G22150
																																	AT5G22160
																																	AT5G22200
																																	AT5G22260	MALE STERILITY 1 (MS1)
																																	AT5G22791
																																	AT5G23000	MYB DOMAIN PROTEIN 37 (MYB37)
																																	AT5G23020	2-ISOPROPYLMALATE SYNTHASE 2 (IMS2)
																																	AT5G23030	TETRASPANIN12 (TET12)
																																	AT5G23260	TRANSPARENT TESTA16 (TT16)
																																	AT5G23660	(SWEET12)
																																	AT5G23810	AMINO ACID PERMEASE 7 (AAP7)
																																	AT5G24900	CYTOCHROME P450, FAMILY 714, SUBFAMILY A, POLYPEPTIDE 2 (CYP714A2)
																																	AT5G24920	GLUTAMINE DUMPER 5 (GDU5)
																																	AT5G24950	CYTOCHROME P450, FAMILY 71, SUBFAMILY A, POLYPEPTIDE 15 (CYP71A15)
																																	AT5G25160	ZINC FINGER PROTEIN 3 (ZFP3)
																																	AT5G25290
																																	AT5G25490
																																	AT5G25950
																																	AT5G26250
																																	AT5G26594	RESPONSE REGULATOR 24 (RR24)
																																	AT5G26660	MYB DOMAIN PROTEIN 86 (MYB86)
																																	AT5G27807	MICRORNA164C (MIR164C)
																																	AT5G27910	NUCLEAR FACTOR Y, SUBUNIT C8 (NF-YC8)
																																	AT5G28490	LIGHT-DEPENDENT SHORT HYPOCOTYLS 1 (LSH1)
																																	AT5G30500	GALACTINOL SYNTHASE 10 (GolS10)
																																	AT5G34871
																																	AT5G35600	HISTONE DEACETYLASE7 (HDA7)
																																	AT5G35660
																																	AT5G35770	STERILE APETALA (SAP)
																																	AT5G36110	CYTOCHROME P450, FAMILY 716, SUBFAMILY A, POLYPEPTIDE 1 (CYP716A1)
																																	AT5G36870	GLUCAN SYNTHASE-LIKE 9 (GSL09)
																																	AT5G36980
																																	AT5G37040
																																	AT5G37300	(WSD1)
																																	AT5G37660	PLASMODESMATA-LOCATED PROTEIN 7 (PDLP7)
																																	AT5G37920
																																	AT5G37980
																																	AT5G38000
																																	AT5G38030
																																	AT5G38120	(4CL8)
																																	AT5G38344
																																	AT5G38750
																																	AT5G38790
																																	AT5G38800	BASIC LEUCINE-ZIPPER 43 (bZIP43)
																																	AT5G38810
																																	AT5G39470
																																	AT5G39473
																																	AT5G40310
																																	AT5G40316
																																	AT5G40348
																																	AT5G41315	GLABROUS 3 (GL3)
																																	AT5G41810
																																	AT5G41905	MICRORNA166E (MIR166E)
																																	AT5G42210
																																	AT5G42500
																																	AT5G42580	CYTOCHROME P450, FAMILY 705, SUBFAMILY A, POLYPEPTIDE 12 (CYP705A12)
																																	AT5G42590	CYTOCHROME P450, FAMILY 71, SUBFAMILY A, POLYPEPTIDE 16 (CYP71A16)
																																	AT5G42600	MARNERAL SYNTHASE (MRN1)
																																	AT5G42610
																																	AT5G42630	ABERRANT TESTA SHAPE (ATS)
																																	AT5G43065
																																	AT5G43760	3-KETOACYL-COA SYNTHASE 20 (KCS20)
																																	AT5G44160	NUTCRACKER (NUC)
																																	AT5G44350
																																	AT5G44417
																																	AT5G44620	CYTOCHROME P450, FAMILY 706, SUBFAMILY A, POLYPEPTIDE 3 (CYP706A3)
																																	AT5G45070	PHLOEM PROTEIN 2-A8 (PP2-A8)
																																	AT5G45210
																																	AT5G45630
																																	AT5G45690
																																	AT5G45840
																																	AT5G46000
																																	AT5G46350	WRKY DNA-BINDING PROTEIN 8 (WRKY8)
																																	AT5G46360	CA2+ ACTIVATED OUTWARD RECTIFYING K+ CHANNEL 3 (KCO3)
																																	AT5G46690	BETA HLH PROTEIN 71 (bHLH071)
																																	AT5G46890
																																	AT5G46900
																																	AT5G47990	CYTOCHROME P450, FAMILY 705, SUBFAMILY A, POLYPEPTIDE 5 (CYP705A5)
																																	AT5G48010	THALIANOL SYNTHASE 1 (THAS1)
																																	AT5G48060
																																	AT5G49270	SHAVEN 2 (SHV2)
																																	AT5G49310	IMPORTIN ALPHA ISOFORM 5 (IMPA-5)
																																	AT5G49320
																																	AT5G49620	MYB DOMAIN PROTEIN 78 (MYB78)
																																	AT5G49630	AMINO ACID PERMEASE 6 (AAP6)
																																	AT5G50080	ETHYLENE RESPONSE FACTOR 110 (ERF110)
																																	AT5G50090
																																	AT5G50130
																																	AT5G50140
																																	AT5G50150
																																	AT5G50470	NUCLEAR FACTOR Y, SUBUNIT C7 (NF-YC7)
																																	AT5G50480	NUCLEAR FACTOR Y, SUBUNIT C6 (NF-YC6)
																																	AT5G50760
																																	AT5G50790	(SWEET10)
																																	AT5G50800	(SWEET13)
																																	AT5G51310
																																	AT5G51360
																																	AT5G51470
																																	AT5G51500
																																	AT5G51610
																																	AT5G51760	ABA-HYPERSENSITIVE GERMINATION 1 (AHG1)
																																	AT5G51780
																																	AT5G51800
																																	AT5G51810	GIBBERELLIN 20 OXIDASE 2 (GA20OX2)
																																	AT5G51930
																																	AT5G52350	EXOCYST SUBUNIT EXO70 FAMILY PROTEIN A3 (EXO70A3)
																																	AT5G53740
																																	AT5G53950	CUP-SHAPED COTYLEDON 2 (CUC2)
																																	AT5G54000
																																	AT5G54020
																																	AT5G54040
																																	AT5G54230	MYB DOMAIN PROTEIN 49 (MYB49)
																																	AT5G54240
																																	AT5G54250	CYCLIC NUCLEOTIDE-GATED CATION CHANNEL 4 (CNGC4)
																																	AT5G54270	LIGHT-HARVESTING CHLOROPHYLL B-BINDING PROTEIN 3 (LHCB3)
																																	AT5G54330
																																	AT5G54660
																																	AT5G54820
																																	AT5G55050
																																	AT5G55135
																																	AT5G55430
																																	AT5G56080	NICOTIANAMINE SYNTHASE 2 (NAS2)
																																	AT5G56490	L -GULONO-1,4-LACTONE ( L -GULL) OXIDASE 4 (GULLO4)
																																	AT5G56970	CYTOKININ OXIDASE 3 (CKX3)
																																	AT5G57090	ETHYLENE INSENSITIVE ROOT 1 (EIR1)
																																	AT5G57130
																																	AT5G57400
																																	AT5G57420	INDOLE-3-ACETIC ACID INDUCIBLE 33 (IAA33)
																																	AT5G57520	ZINC FINGER PROTEIN 2 (ZFP2)
																																	AT5G57620	MYB DOMAIN PROTEIN 36 (MYB36)
																																	AT5G58500	LIGHT SENSITIVE HYPOCOTYLS 5 (LSH5)
																																	AT5G59120	SUBTILASE 4.13 (SBT4.13)
																																	AT5G59360
																																	AT5G59520	ZRT/IRT-LIKE PROTEIN 2 (ZIP2)
																																	AT5G60010
																																	AT5G60060
																																	AT5G60720
																																	AT5G60770	NITRATE TRANSPORTER 2.4 (NRT2.4)
																																	AT5G61690	ATP-BINDING CASSETTE A11 (ABCA11)
																																	AT5G61710
																																	AT5G62320	MYB DOMAIN PROTEIN 99 (MYB99)
																																	AT5G62510
																																	AT5G63560
																																	AT5G63590	FLAVONOL SYNTHASE 3 (FLS3)
																																	AT5G63715	MICRORNA166G (MIR166G)
																																	AT5G64530	XYLEM NAC DOMAIN 1 (XND1)
																																	AT5G64690
																																	AT5G64790
																																	AT5G65100
																																	AT5G65170
																																	AT5G65320
																																	AT5G65340
																																	AT5G65590
																																	AT5G66870	ASYMMETRIC LEAVES 2-LIKE 1 (ASL1)
																																	AT5G66970
																																	AT5G66980
																																	AT5G66990	RWP-RK DOMAIN-CONTAINING 3 (RKD3)
